# Supplementary material
Source: PubMed Central journal article supplement (PMC4879309)
Supplement: JCM.00318-16_zjm999094972so1.pdf [file JCM.00318-16_zjm999094972so1.pdf]

**Supplementary Table 1. Description of the 39 cases of non-*Aspergillus* invasive mold infections (NAIMI)**

| Study Number | Underlying condition <sup>1</sup> | Pathogen                   | Site of infection | First-line therapy <sup>2</sup> | MIC [ $\mu\text{g/ml}$ ] | Surgery | 6 week response <sup>3</sup> |
|--------------|-----------------------------------|----------------------------|-------------------|---------------------------------|--------------------------|---------|------------------------------|
| 1            | HM (Neutropenia)                  | <i>Lichtheimia</i> spp.    | Lung              | Voriconazole                    | >16                      | No      | Failure (death)              |
| 2            | HM (HSCT)                         | <i>Lichtheimia</i> spp.    | Lung, skin        | None                            | -                        | No      | Failure (death)              |
| 3            | SOT (heart)                       | <i>Cunninghamella</i> spp. | Lung              | Micafungin                      | >16                      | Yes     | Failure (stable)             |
| 4            | HM (Neutropenia)                  | <i>Cunninghamella</i> spp. | Lung, skin, brain | Amphotericin B                  | 4                        | No      | Failure (death)              |
| 5            | HM (HSCT)                         | <i>Cunninghamella</i> spp. | Lung              | Micafungin                      | >16                      | No      | Response (partial)           |
| 6            | SOT (heart)                       | <i>Cunninghamella</i> spp. | Lung              | Micafungin                      | >16                      | No      | Failure (death)              |
| 7            | HM (Neutropenia)                  | <i>Mucor</i> spp.          | Lung              | Micafungin                      | >16                      | No      | Failure (death)              |
| 8            | Diabetes                          | <i>Mucor</i> spp.          | Lung, blood       | None                            | -                        | No      | Failure (death)              |
| 9            | SOT (lung)                        | <i>Mucor</i> spp.          | Skin              | Amphotericin B                  | 0.25                     | Yes     | Response (complete)          |
| 10           | HM (Neutropenia)                  | <i>Rhizopus</i> spp.       | Sinus             | Amphotericin B                  | 0.5                      | Yes     | Response (partial)           |
| 11           | Diabetes                          | <i>Rhizopus</i> spp.       | Skin              | Amphotericin B                  | 0.25                     | Yes     | Response (complete)          |
| 12           | HM (HSCT, Neutropenia)            | <i>Rhizopus</i> spp.       | Sinus, ear        | Micafungin                      | >16                      | Yes     | Failure (death)              |
| 13           | HM (Neutropenia)                  | <i>Rhizopus</i> spp.       | Sinus, eye        | Voriconazole                    | 8                        | Yes     | Failure (death)              |
| 14           | HM (HSCT)                         | <i>Rhizopus</i> spp.       | Lung              | Amphotericin B                  | 0.5                      | Yes     | Response (complete)          |
| 15           | Diabetes                          | <i>Rhizopus</i> spp.       | Sinus, eye, brain | Amphotericin B                  | 1                        | Yes     | Failure (progression)        |
| 16           | SOT (heart)                       | <i>Rhizopus</i> spp.       | Skin              | Amphotericin B                  | 0.5                      | Yes     | Response (partial)           |

|    |                        |                       |                    |                |     |     |                       |
|----|------------------------|-----------------------|--------------------|----------------|-----|-----|-----------------------|
| 17 | HM (HSCT)              | <i>Rhizopus</i> spp.  | Lung               | Micafungin     | >16 | Yes | Response (complete)   |
| 18 | HM (Neutropenia)       | <i>Rhizopus</i> spp.  | Sinus              | Amphotericin B | 0.5 | Yes | Failure (death)       |
| 19 | SOT (lung)             | <i>Rhizopus</i> spp.  | Lung               | Voriconazole   | 16  | Yes | Response (partial)    |
| 20 | SOT (lung)             | <i>Fusarium</i> spp.  | Skin               | Voriconazole   | >16 | Yes | Response (partial)    |
| 21 | HM (Neutropenia)       | <i>Fusarium</i> spp.  | Lung, blood, skin  | Voriconazole   | >16 | No  | Failure (death)       |
| 22 | HM (HSCT, Neutropenia) | <i>Fusarium</i> spp.  | Lung, blood        | Micafungin     | >16 | No  | Failure (death)       |
| 23 | HM (Neutropenia)       | <i>Fusarium</i> spp.  | Lung, skin, brain  | Voriconazole   | 16  | No  | Failure (death)       |
| 24 | HM (Neutropenia)       | <i>Fusarium</i> spp.  | Lung, skin         | Voriconazole   | >16 | Yes | Failure (death)       |
| 25 | SOT (lung)             | <i>Fusarium</i> spp.  | Lung, blood, heart | None           | -   | No  | Failure (death)       |
| 26 | HM (HSCT, Neutropenia) | <i>Fusarium</i> spp.  | Skin               | Micafungin     | >16 | No  | Response (complete)   |
| 27 | SOT (lung)             | <i>Fusarium</i> spp.  | Lung               | Posaconazole   | >16 | Yes | Failure (progression) |
| 28 | HM (HSCT)              | <i>Fusarium</i> spp.  | Lung, blood, skin  | Voriconazole   | 16  | No  | Failure (death)       |
| 29 | HM (HSCT, Neutropenia) | <i>Fusarium</i> spp.  | Skin, blood        | Voriconazole   | >16 | No  | Failure (death)       |
| 30 | SOT (lung)             | <i>Fusarium</i> spp.  | Lung               | Voriconazole   | >16 | No  | Failure (death)       |
| 31 | HM (Neutropenia)       | <i>Fusarium</i> spp.  | Skin               | Voriconazole   | 16  | No  | Failure (progression) |
| 32 | SOT (lung)             | <i>S. apiospermum</i> | Lung               | Voriconazole   | 1   | No  | Failure (progression) |
| 33 | HM (HSCT)              | <i>S. apiospermum</i> | Lung               | Amphotericin B | >16 | No  | Failure (stable)      |
| 34 | SOT (kidney)           | <i>S. apiospermum</i> | Peritoneum         | Voriconazole   | 2   | Yes | Response (partial)    |

|    |                                   |                               |            |                |      |     |                       |
|----|-----------------------------------|-------------------------------|------------|----------------|------|-----|-----------------------|
| 35 | SOT (lung)                        | <i>S. prolificans</i>         | Lung       | Voriconazole   | >16  | Yes | Failure (stable)      |
| 36 | SOT (lung)                        | <i>Scopulariopsis</i><br>spp. | Lung       | Voriconazole   | 16   | No  | Failure (stable)      |
| 37 | HM<br>(Neutropenia)               | <i>P. lilacinum</i>           | Lung, skin | Voriconazole   | 0.25 | No  | Response<br>(partial) |
| 38 | Pansclerotic<br>morphea<br>(HSCT) | <i>P. lilacinum</i>           | Skin       | Amphotericin B | >16  | No  | Failure (death)       |
| 39 | HM (HSCT,<br>Neutropenia)         | <i>P. variotii</i>            | Sinus      | Voriconazole   | >16  | Yes | Failure (death)       |

<sup>1</sup> Main underlying condition predisposing to NAIMI

<sup>2</sup> First empirical antifungal therapy administered and continued for at least 72h

<sup>3</sup> Response to therapy assessed according to EORTC-MSG definitions (Segal BH et al. Clin Infect Dis 2008; 47:674-83)

HM: hematologic malignancy, HSCT: hematopoietic stem cell transplantation, SOT: solid organ transplantation
